# Supplementary material
Source: PubMed Central journal article supplement (PMC4112278)
Supplement: NIHMS585099-supplement-1.pdf [file NIHMS585099-supplement-1.pdf]

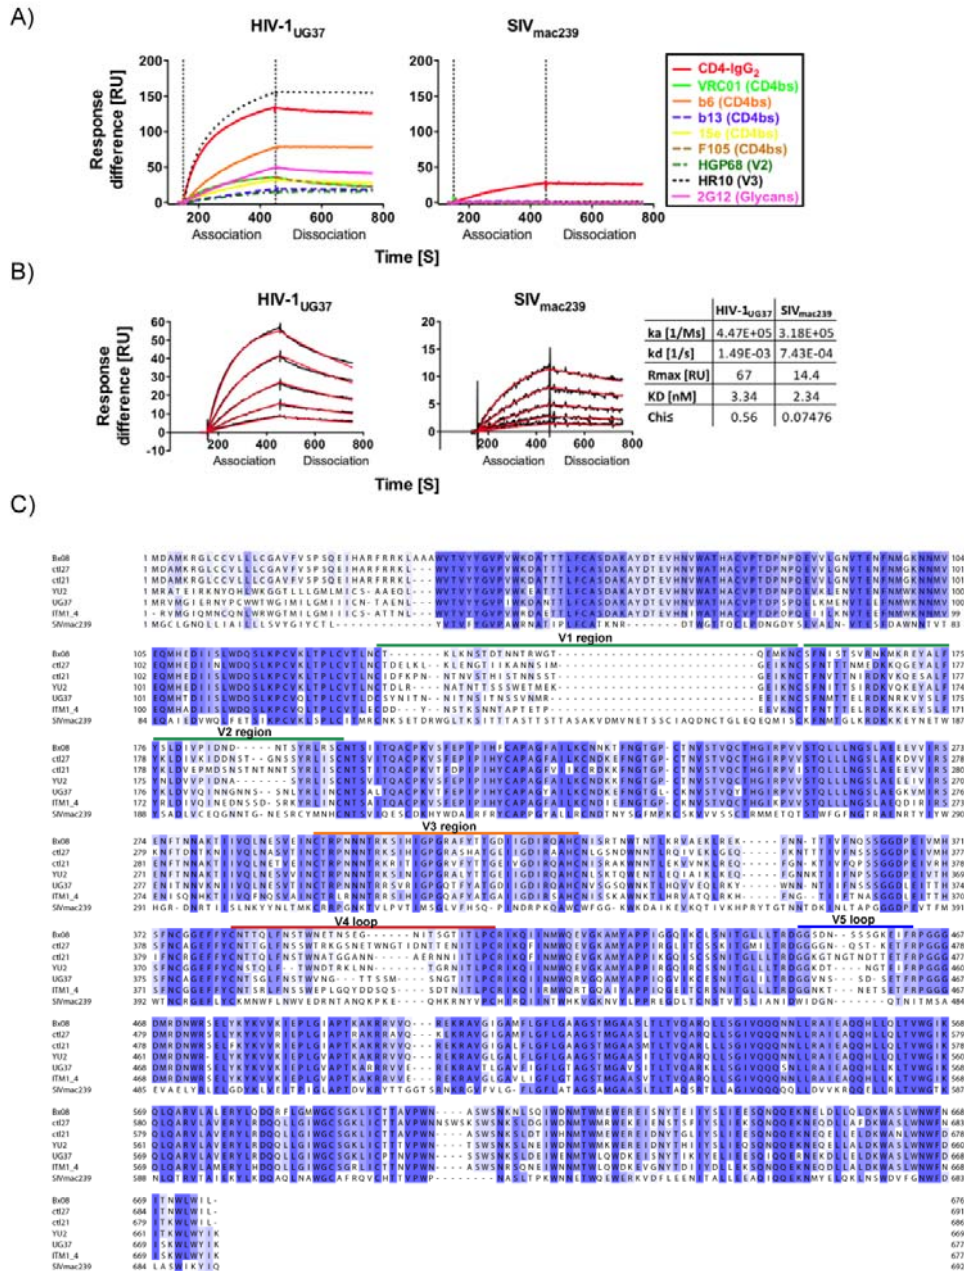

**Supplementary FIGURE 1. Surface plasmon resonance analysis of mAb and soluble CD4 binding to SIV<sub>mac239</sub>.**

(A) Interaction of an extended panel of mAb with HIV-1<sub>UG37</sub> or SIV<sub>mac239</sub> is shown as in Fig.1C. (B) Kinetic data of monomeric soluble CD4 interaction with HIV-1 and SIV<sub>mac239</sub> gp140s was recorded and fitted to a 1:1 Langmuir binding model. Traces are plotted in black with curves showing the fit results overlain in red. (C) Sequence alignment of the gp160 sequences from the HIV-1 variants ITM1\_4, YU2, UG37 Bx1084, ct121 and ct1127 as well as from SIV<sub>mac239</sub> shaded by sequence conservation. The V1/V2, V3 regions as well as the V4 and V5 loops are highlighted.

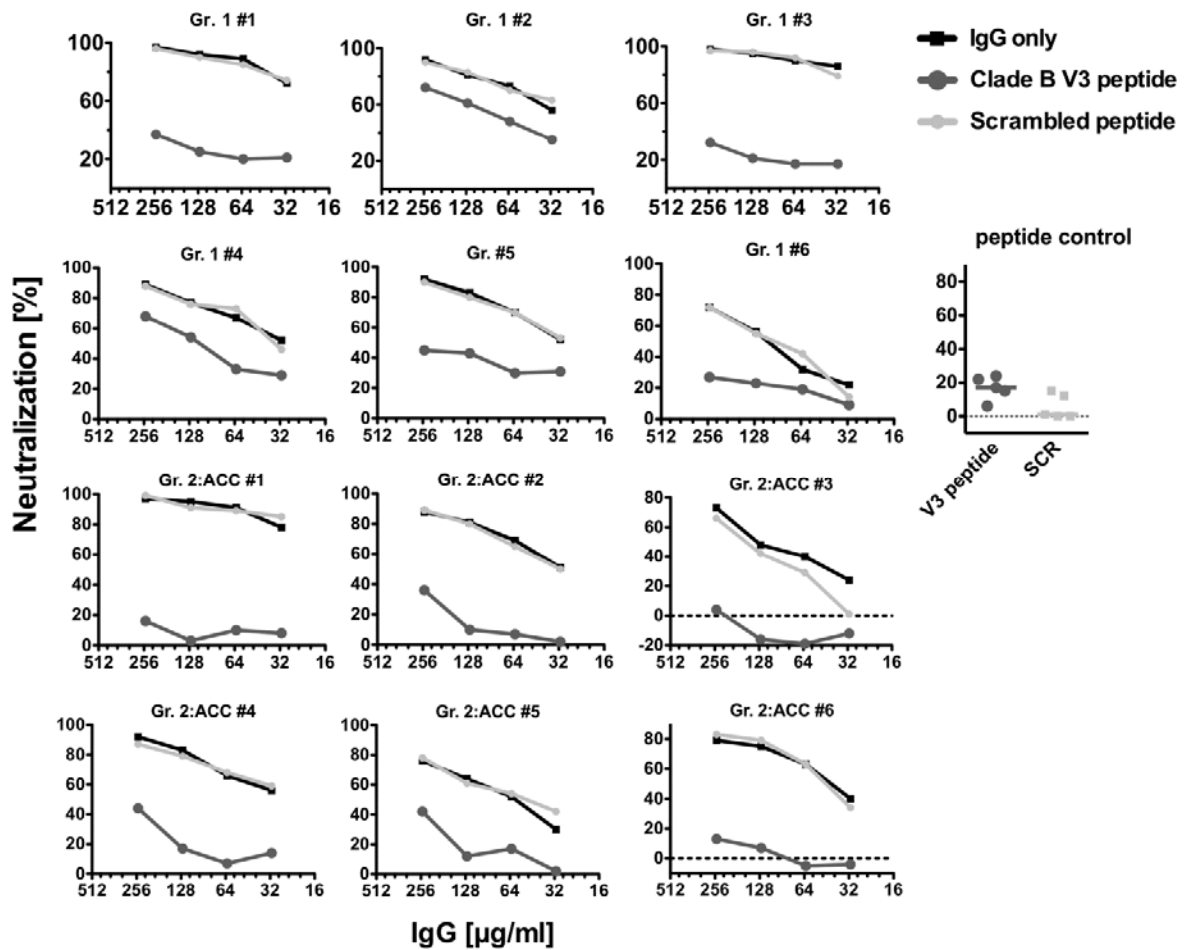

**Supplementary FIGURE 2. Entire panel of animals tested in the peptide inhibition assay.**

Individual results of the peptide inhibition assay as presented in Fig.6A. Percent neutralization is depicted on the y-axis and concentration of purified IgG on the x-axis. (A) Neutralization is displayed for individual animals in the absence (black) or presence of a peptide covering the V3 region from HIV-1 clade B virus MN.3 (dark grey) or a scrambled control peptide (light grey). Peptide controls without IgG did not result in significant enhancement or neutralization of the virus.

Supplementary Table 1. Potent neutralization ID<sub>50</sub> titres after immunization.

| Sample ID | ID50 in TZM-bl Cells <sup>1</sup> |                |                |                |             | ID50 in A3R5.7 Cells <sup>1</sup> |                 |                |                |
|-----------|-----------------------------------|----------------|----------------|----------------|-------------|-----------------------------------|-----------------|----------------|----------------|
|           | MN.3                              | SF162.LS       | MW965.26       | TH023.6        | 7312A/V434M | 9020.A13. LucR                    | RHPA. LucR      | CH77. LucR     | SC22.3C2. LucR |
|           | Clade B Tier 1                    | Clade B Tier 1 | Clade C Tier 1 | CRF01AE Tier 1 | HIV-2       | Clade B Tier 1                    | Clade B Tier 1B | Clade B Tier 2 | Clade B Tier 2 |
| Gr.1 A1   | 335                               | 153            | 33             | 31             |             | 385                               | 215             | 783            | 103            |
| Gr.1 A2   | 4480                              | 1156           | 144            | 1625           | 2074        | 1215                              | 429             | 20             | 132            |
| Gr.1 A3   | 218                               | 447            | 111            | 43             | 230         | 1230                              | 348             | 70             | 74             |
| Gr.1 A4   | 186                               | 88             | 20             | 45             |             | 270                               | 206             | 20             | 20             |
| Gr.1 A5   | 3165                              | 1582           | 2754           | 2790           |             | 1223                              | 797             | 240            | 100            |
| Gr.1 A8   | 20254                             | 3583           | 144            | 115            | 149         | 5595                              | 2206            | 1889           | 154            |
| Gr.1 B1   | 174                               | 104            | 119            | 20             |             | 433                               | 199             | 20             | 44             |
| Gr.1 B2   | 1076                              | 20             | 168            | 98             | 1918        | 1685                              | 1330            | 20             | 355            |
| Gr.1 B3   | 1535                              | 1627           | 316            | 135            |             | 809                               | 287             | 20             | 21             |
| Gr.1 B6   | 294                               | 277            | 20             | 20             |             | 634                               | 355             | 589            | 58             |
| Gr.1 B7   | 213                               | 270            | 32             | 20             | 501         | 1282                              | 311             | 20             | 47             |
| Gr.1 B8   | 1881                              | 97             | 29             | 20             | 765         | 4327                              | 1457            | 20             | 106            |
| Gr.2 C3   | 93                                | 34             | 37             | 27             |             | 411                               | 159             | 20             | 62             |
| Gr.2 C4   | 361                               | 126            | 67             | 25             |             | 289                               | 122             | 20             | 20             |
| Gr.2 C5   | 362                               | 34             | 21             | 20             |             | 638                               | 132             | 20             | 58             |
| Gr.2 C6   | 27940                             | 3833           | 203            | 90             | 573         | 2985                              | 450             | 1530           | 156            |
| Gr.2 C7   | 1029                              | 724            | 189            | 45             | 574         | 702                               | 261             | 20             | 36             |
| Gr.2 C8   | 279                               | 185            | 255            | 190            | 266         | 238                               | 235             | 20             | 20             |
| Gr.2 D1   | 2153                              | 1426           | 143            | 30             |             | 949                               | 263             | 20             | 20             |
| Gr.2 D2   | 6058                              | 642            | 80             | 21             | 1103        | 3262                              | 751             | 20             | 99             |
| Gr.2 D3   | 248                               | 255            | 57             | 22             |             | 760                               | 222             | 20             | 38             |
| Gr.2 D4   | 27652                             | 579            | 93             | 74             | 496         | 1442                              | 271             | 20             | 29             |
| Gr.2 D5   | 591                               | 356            | 257            | 68             |             | 994                               | 462             | 1429           | 89             |
| Gr.2 D7   | 6465                              | 394            |                |                | 1016        | 602                               | 325             | 113            | 54             |

Serum ID50 titres obtained from individual animals at week 22 from the first study (Group (Gr) 1(no adjuvant) and 2(AAC adjuvant)) are color coded as follows: white boxes, titre<20; green boxes, titre<100; yellow boxes, titre<500; orange boxes, titre<1000; and red boxes, titre >1000. Grey boxes, not determined

Additional viruses tested in TZM-bl assay and all samples below 100; JR-FL, Q23.17, 6535.3, QH0692.42
